**Title:** Comparison of pretraining models and strategies for health-related social media text classification

**Authors:**

Yuting Guo, MS<sup>1</sup>

Yao Ge, MS<sup>1</sup>

Yuan-Chi Yang, PhD<sup>1</sup>

Mohammed Ali Al-Garadi, PhD<sup>1</sup>

\*Abeed Sarker, PhD<sup>1</sup>

<sup>1</sup>Department of Biomedical Informatics, School of Medicine, Emory University, Atlanta, GA, United States;

\*Corresponding author

Postal address: 101 Woodruff Circle, 4th Floor East, Atlanta, GA 30322

Email: [abeed@dbmi.emory.edu](mailto:abeed@dbmi.emory.edu)

Phone: 602-474-6203

**Word count:**

Abstract: 160

Body: 4150

**Keywords:**

Text Classification;

Social Media;

Data Science;

Natural Language Processing;

Machine Learning;

## **Abstract**

### **Motivation**

Pretrained contextual language models proposed in the recent past have been reported to achieve state-of-the-art performances in many natural language processing (NLP) tasks. There is a need to benchmark such models for targeted NLP tasks, and to explore effective pretraining strategies to improve machine learning performance.

### **Results**

In this work, we addressed the task of health-related social media text classification. We benchmarked five models—RoBERTa, BERTweet, TwitterBERT, BioClinical\_BERT, and BioBERT on 22 tasks. We attempted to boost performance for the best models by comparing distinct pretraining strategies—domain-adaptive pretraining (DAPT), source-adaptive pretraining (SAPT), and topic-specific pretraining (TSPT). RoBERTa and BERTweet performed comparably in most tasks, and better than others. For pretraining strategies, SAPT performed better or comparable to the *off-the-shelf* models, and significantly outperformed DAPT. SAPT+TSPT showed consistently high performance, with statistically significant improvement in one task. Our findings demonstrate that RoBERTa and BERTweet are excellent off-the-shelf models for health-related social media text classification, and extended pretraining using SAPT and TSPT can further improve performance.

### **Availability and implementation**

Source code for our model and data preprocessing is available under the Github repository [https://github.com/yguo0102/transformer\\_dapt\\_sapt\\_tapt](https://github.com/yguo0102/transformer_dapt_sapt_tapt). Datasets must be obtained from original sources, as described in supplementary material.

### **Supplementary information**

Supplementary data are available at *Bioinformatics* online.

## INTRODUCTION

Supervised text classification is perhaps the most fundamental machine learning task in natural language processing (NLP), and it has been employed extensively to design data-centric solutions to research problems within the broader biomedical domain. Formally, this task involves the training of machine learning models using a set of text (often referred to as *records* or *documents* in early research) and label (also referred to as *class* or *category*) pairs, where the number of labels is finite, and then employing the trained model to automatically predict the labels for previously-unseen texts.<sup>1</sup> Compared to supervised classification of structured data, text classification typically poses additional challenges due to the presence of large feature spaces (*ie.*, high dimensionality of feature space)<sup>2,3</sup> and feature sparsity.<sup>4,5</sup> Support vector machines (SVMs),<sup>6</sup> Random forests,<sup>7</sup> and logistic regression<sup>8</sup> had produced state-of-the-art (SOTA) classification performances for many tasks over the years due to their abilities to handle large feature sets consisting of *bag-of-words* or *n-grams*. These *traditional* approaches typically relied on feature engineering methods to generate salient features from texts, and improve performances particularly by addressing the feature sparsity problem. Text classification tasks within the medical domain primarily benefited from domain-specific features, often generated via the utilization of knowledge sources such as the unified medical language system (UMLS).<sup>9</sup> With the emergence of methods for generating effective numeric representations of texts or word embeddings (dense vectors), coupled with advances in computational capabilities, deep neural network based approaches became dominant in this space, obtaining SOTA performances in many text classification tasks.<sup>10,11</sup> Such

approaches use dense vector representations, and generally require large volumes of annotated data. Word embedding generation approaches such as Word2Vec<sup>12</sup> and GloVe<sup>13</sup> are capable of effectively capturing semantic representations of words/phrases (*ie.*, text fragments with similar meanings appear close together in vector space), which n-gram based approaches were not capable of. However, these context-free embedding generation approaches do not provide any mechanism for disambiguating homonyms (*eg.*, the term ‘bank’ in ‘river bank’ and ‘bank cheque’ would have the same vector representation). This limitation was overcome relatively recently via the proposal of transformer-based models that are capable of capturing contextual vector representations for texts.

Pretrained transformer-based models such as bidirectional encoder representations from transformers (BERT)<sup>14</sup> and RoBERTa<sup>15</sup> have achieved SOTA results in most domain-independent NLP tasks (*ie.*, tasks involving generic texts), often with substantial performance increases over past SOTA approaches. Recent research efforts attempted to boost the performances of pretrained transformer-based models on domain-specific tasks by domain-adaptative pretraining (DAPT), which involves further training of a generic pretrained model such as BERT on domain-specific data. For example, Lee et al. (2019)<sup>16</sup> proposed BioBERT by pretraining BERT on a large biomedical corpus of PubMed abstracts, and demonstrated that it outperforms BERT on three representative biomedical text mining tasks. Alsentzer et al. (2019)<sup>17</sup> attempted to adapt pretrained models for clinical text by training BioBERT on clinical notes, resulting in the creation of BioClinical\_BERT.<sup>18</sup> Gururangan et al. (2020)<sup>19</sup> illustrated the usefulness of DAPT by continuing training of pretrained models on domain-specific data from four different domains (biomedical and computer science publications, news, and reviews).

However, some studies, including our own pilot, demonstrated that DAPT is not guaranteed to achieve SOTA results for health-related NLP tasks involving social media data.<sup>20,21</sup> To address such performance issues, several studies have experimented by continuing pretraining on social media data (we refer to it as source-adaptive pretraining; SAPT), and demonstrated their superior performance on social media specific NLP tasks.<sup>22,23</sup>

Data from social media, often referred to as consumer-/patient-generated data, is increasingly being utilized for health-related research.<sup>24–26</sup> Social media has several attractive characteristics—large volumes of data are available, are generated directly from large segments of the population, can be captured in close to real-time, and can be obtained with little to no cost, to name a few. However, from the perspective of NLP and machine learning, social media presents unique challenges due to the presence of misspellings, noise, and colloquial expressions. NLP of health-related text is itself more challenging compared to NLP of generic text,<sup>27,28</sup> and the characteristics of social media data further exacerbate the challenges. Typically, NLP methods developed for generic text underperform when applied to health-related texts from social media. For example, for the task of adverse drug event classification, the same SVM model with identical feature generation methods was shown to exhibit significant performance differences between data from medical literature and social media ( $F_1$ -score dropped from 0.812 to 0.597).<sup>29</sup>

The emergence of transformer-based models and pretraining has thus opened up new opportunities for social media-based health NLP research. However, although recent studies have demonstrated the utility of these emergent models on social media-based datasets, there is a paucity of research available that (i) enables the direct comparison of

distinct pretrained models on a large number of social media-based health-related datasets, or (ii) provides guidelines about strategies for improving machine learning performance on such specialized datasets. Pretraining language models is a resource-intensive task, and it is often impossible for health informatics researchers to conduct extensive pretraining or compare multiple pretrained models. In this paper, we investigate the influence of pretraining strategies on performance for health-related text classification tasks involving social media data. In addition, since health-related NLP tasks generally focus on specific topics, we explore a new pretraining strategy—using topic-specific data for extended pretraining (we refer to this as topic-specific pretraining; TSPT)—and compare it with SAPT and DAPT for health-related social media text classification. TSPT can be viewed as a further specialization of DAPT or SAPT, where additional pretraining is performed using data related to the topic only, regardless of the source.

## **Contributions**

A summary of the specific contributions of this paper are as follows:

1. We compare the performances of five models pretrained with texts from different domains and sources—RoBERTa<sup>15</sup> (generic text), BERTweet<sup>22</sup> and Twitter BERT (social media text, specifically Twitter),<sup>20</sup> BioClinical\_BERT<sup>17</sup> (clinical text), and BioBERT<sup>16</sup> (biomedical literature text)—on 22 social media-based health-related text classification tasks.
2. We perform TSPT using the masked language model (MLM),<sup>30</sup> and assess its impact on classification performance compared to other pretraining strategies for three tasks.

3. We conduct an analysis of document-level embeddings at distinct stages of processing, namely pretraining and fine-tuning, to study how the embeddings are shifted by DAPT, SAPT and TSPT.
4. We summarize effective strategies to serve as guidance for future research in this space.

## **SYSTEMS AND METHODS**

We used 22 health-related social media text classification tasks for comparing pretrained models. Manually annotated data for all these tasks were either publicly available or had been made available through shared tasks. The tasks covered diverse topics including, but not limited to, adverse drug reactions (ADRs),<sup>29</sup> cohort identification for breast cancer,<sup>31</sup> non-medical prescription medication use (NPMU),<sup>32</sup> informative COVID-19 content detection,<sup>33</sup> medication consumption,<sup>34</sup> pregnancy outcome detection,<sup>35</sup> symptom classification,<sup>36</sup> suicidal ideation detection,<sup>37</sup> identification of drug addiction and recovery intervention,<sup>38</sup> signs of pathological gambling and self-harm detection,<sup>39</sup> and sentiment analysis and factuality classification in e-health forums.<sup>40</sup> Table 1 presents the details/sources for the classification tasks, the evaluation metric for each task, training and test set sizes, the number of classes, and the inter-annotator agreement (IAA) for each dataset, if available. Eleven tasks involved binary classification, eight involved three-class classification, and one involved four-, five- or six-class classification. The datasets combined included a total of 126,184 manually-annotated instances, with 98,161 (78%) instances for training and 28,023 (22%) for evaluation. The datasets involved data from different social media platforms—11 from Twitter, 6 from MedHelp (<https://www.medhelp.org/>), 4 from Reddit, and 1 from WebMD



(<https://www.webmd.com/>). For evaluation, we attempted to use the same metrics as the original papers or as defined in the shared tasks.

| <i>ID</i> | <i>Task</i>                                                            | <i>Source</i> | <i>Evaluation metric</i> | <i>TRN</i> | <i>TST</i> | <i>L</i> | <i>IAA</i> |
|-----------|------------------------------------------------------------------------|---------------|--------------------------|------------|------------|----------|------------|
| 1         | ADR Detection                                                          | Twitter       | P_F1                     | 4318       | 1152       | 2        | 0.71       |
| 2         | Breast Cancer                                                          | Twitter       | P_F1                     | 3513       | 1204       | 2        | 0.85       |
| 3         | NPMU characterization                                                  | Twitter       | P_F1*                    | 11829      | 3271       | 4        | 0.86       |
| 4         | WNUT-20-task2 (informative COVID-19 tweet detection)                   | Twitter       | P_F1                     | 6238       | 1000       | 2        | 0.80       |
| 5         | SMM4H-17-task1 (ADR detection)                                         | Twitter       | P_F1                     | 5340       | 6265       | 2        | 0.69       |
| 6         | SMM4H-17-task2 (medication consumption)                                | Twitter       | M_F1                     | 7291       | 5929       | 3        | 0.88       |
| 7         | SMM4H-21-task1 (ADR detection)                                         | Twitter       | P_F1                     | 15578      | 913        | 2        | -          |
| 8         | SMM4H-21-task3a (regimen change on Twitter)                            | Twitter       | P_F1                     | 5295       | 1572       | 2        | -          |
| 9         | SMM4H-21-task3b (regimen change on WebMD)                              | WebMD         | P_F1                     | 9344       | 1297       | 2        | -          |
| 10        | SMM4H-21-task4 (adverse pregnancy outcomes)                            | Twitter       | P_F1                     | 4926       | 973        | 2        | 0.90       |
| 11        | SMM4H-21-task5 (COVID-19 potential case)                               | Twitter       | P_F1                     | 5790       | 716        | 2        | 0.77       |
| 12        | SMM4H-21-task6 (COVID-19 symptom)                                      | Twitter       | M_F1                     | 8188       | 500        | 3        | -          |
| 13        | Suicidal Ideation Detection                                            | Reddit        | M_F1                     | 1695       | 553        | 6        | 0.88       |
| 14        | Drug Addiction and Recovery Intervention                               | Reddit        | M_F1                     | 2032       | 601        | 5        | -          |
| 15        | eRisk-21-task1 (Signs of Pathological Gambling)                        | Reddit        | P_F1                     | 1511       | 481        | 2        | -          |
| 16        | eRisk-21-task2 (Signs of Self-Harm)                                    | Reddit        | P_F1                     | 926        | 284        | 2        | -          |
| 17        | Sentiment Analysis in e-Health Forums (Food Allergy Related)           | MedHelp       | M_F1                     | 618        | 191        | 3        | 0.75       |
| 18        | Sentiment Analysis in e-Health Forums (Crohn'S Disease Related)        | MedHelp       | M_F1                     | 1056       | 317        | 3        | 0.72       |
| 19        | Sentiment Analysis in e-Health Forums (Breast Cancer Related)          | MedHelp       | M_F1                     | 551        | 161        | 3        | 0.75       |
| 20        | Factuality Classification in e-Health Forums (Food Allergy Related)    | MedHelp       | M_F1                     | 580        | 159        | 3        | 0.73       |
| 21        | Factuality Classification in e-Health Forums (Crohn'S Disease Related) | MedHelp       | M_F1                     | 1018       | 323        | 3        | 0.75       |
| 22        | Factuality Classification in e-Health Forums (Breast Cancer Related)   | MedHelp       | M_F1                     | 524        | 161        | 3        | 0.75       |

**Table 1.** Details of the classification tasks and the data statistics. P\_F1 denotes the F<sub>1</sub>-score for the positive class, and M\_F1 denotes the micro-averaged F<sub>1</sub>-score among all the classes. \*For NPMU, P\_F1 denotes the F<sub>1</sub>-score of the non-medical use class. TRN, TST, and L denote the training set size, the test set size, and the number of classes, respectively. IAA is the inter-

annotator agreement, where Task 4 used Fleiss’K, Task 13 used Krippendorff’s alpha, Task 17-22 provided IAA but did not mention the coefficient they used, and other tasks used Cohen’s Kappa.

## **Data collection and preparation**

To compare DAPT, SAPT, and TSPT, we required unlabeled data from (i) different sources and (ii) different domains, and (iii) specific to targeted topics. We first collected data from three sources—Twitter (social media; source-specific), PubMed abstracts and full-text articles (medical domain; domain-specific), and OpenWebText (generic/domain independent). For the Twitter and PubMed data, we created additional subsets for TSPT by applying hand-crafted filters. Since the process of pretraining is computationally intensive and time consuming, to reduce the time and environmental cost of our experiments, we specifically focused on 3 tasks for extended comparative analysis instead of all 22 tasks—breast cancer, NPMU, and informative COVID-19 tweet classification. For the breast cancer and NPMU classification tasks, we used the same keyword and regular expression filters described in Al-Garadi et al. (2020)<sup>41</sup> (*ie.*, breast cancer-related expressions) and Al-Garadi et al. (2021)<sup>32</sup> (*ie.*, medication names and their spelling variants) to collect additional topic-specific data. For the COVID-19 classification task, we used filtered data from a large dataset from our prior work<sup>42</sup> using the keywords ‘*covid*’, ‘*corona virus*’, and ‘*coronavirus*’. These filters were applied to the PubMed and Twitter datasets, leading to two TSPT datasets for each. Thus, the filtered Twitter data was a topic-specific subset of source-specific data, and the filtered PubMed data was a topic-specific subset of domain-specific data. For comparison, we also created *off-topic* equivalents of each of these TSPT sets by sampling from the data not detected by the filters from both sources. To summarize, we created 5 pretraining datasets for each classification task (i) topic-specific and domain-specific (from PubMed), (ii) topic-specific and source-specific

(from Twitter), (iii) off-topic and domain-specific, (iv) off-topic and source-specific, and (v) generic (*ie.*, the data from OpenWebText). For fair comparison, we ensured that the off-topic, topic-specific, and generic pretraining sets were of the same sizes for each task: 298,000, 586,000 and 272,000 samples for breast cancer, NPMU and COVID-19, respectively. These sizes were dictated by the number of topic-specific posts we could find. For the web content from OpenWebText and research articles from PubMed, all the documents were chunked into sentences, and each sample is a sentence randomly selected from all the sentences. To further study the effect of pretraining data size for source-specific data, we created three additional large pretraining sets including 1 million samples using the same strategies: (i) topic-specific and source-specific (from Twitter), (ii) off-topic and source-specific, and (iii) generic. PubMed data was not included for these large data experiments due to the availability of the limited topic-specific data related to the three tasks.

## **Model architectures**

The model architectures for the masked language model (MLM) and classification are shown in Figure 1. MLM is an unsupervised task in which some of the tokens in a text sequence are randomly masked in the input and the objective of the model is to predict the masked text segments. In Figure 1(a), the input  $\{t_1, \dots, t_n\}$  denotes a text sequence with some tokens masked. The encoder embeds the text sequence as an embedding matrix consisting of token embeddings  $\{e_{t_1}, \dots, e_{t_n}\}$ . The embeddings of the masked tokens are fed into a shared linear fully-connected layer, and a Softmax layer to predict the masked token. For each masked token, the output is a probability vector that has the same size as the vocabulary. During classification, the individual token embeddings are combined into

a document embedding ( $e_d$ ) that represents the full instance of text sequence to be classified by average pooling. This document embedding is then fed into a linear fully-connected layer and a Softmax layer to predict the class of the instance.

For extended pretraining, we initialized our MLM models from RoBERTa\_Base and BERTweet, respectively, and performed the pretraining on the off-topic, topic-specific and generic pretraining sets we curated. We chose RoBERTa\_Base and BERTweet as the initial models for these experiments because they outperformed the other models in our initial benchmarking experiments over the 22 datasets (see Results). The generic pretraining was only required to be done once for all three tasks, but the topic-specific and off-topic pretraining were distinct for each task. After pretraining, we fine-tuned each model on the target classification task, where the encoder of the classification model was the same encoder of the MLM model.

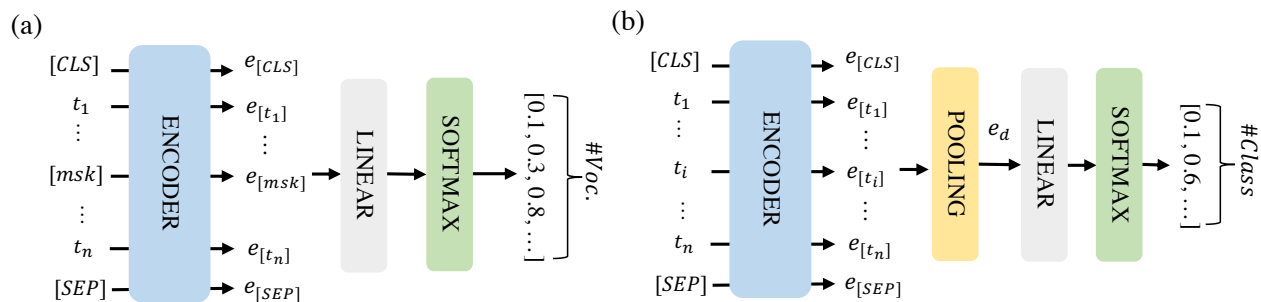

**Figure 1.** The model architectures for MLM (a) and classification (b).  $[CLS]$  and  $[SEP]$  are two special tokens indicating the start and end of the text sequence and  $[msk]$  are masked tokens.

## Evaluation

All system configurations were evaluated against each other based on the metrics shown in Table 1.

### Statistical Significance

In order to better compare the performance of different models, we estimated the 95% confidence intervals on the test score of each model and on the performance difference between the models using a bootstrap resampling method<sup>43</sup>. Specifically, the 95% confidence intervals on the test scores are computed as follows: (i) we randomly chose  $K$  samples from the test set with replacement and computed the test score of the selected samples; (ii) we repeated the previous step  $k$  times and to get  $k$  scores; (iii) we sorted the  $k$  scores and estimated the 95% confidence interval by dropping the top 2.5% scores and the bottom 2.5% scores. Similarly, when estimating the 95% confidence interval on the performance difference between two models  $A$  and  $B$ , we first randomly chose  $K$  samples from the test set with replacement and computed the difference in test scores ( $s_A - s_B$ ), where  $s_A$  and  $s_B$  are the test scores of the models  $A$  and  $B$  on the selected samples. The following steps were the same as the steps (ii) and (iii) as described above. If the 95% confidence interval did not contain zero (*ie.*, no difference in the test scores), the performances of the models  $A$  and  $B$  were considered to be statistically significant. In our experiments, we set  $K$  to be equal to the size of the test set and set  $k$  as 1000 for each task.

## Document embedding transfer evaluation

Past studies have shown that pretrained transformer-based models can generate embedding vectors that might capture syntactic and semantic information of texts.<sup>44–46</sup> Inspired by these works, we attempted to study the effectiveness of SAPT and TSPT by exploring the change in document embeddings following these two pretraining strategies. For each topic, we measured the cosine similarities between the document embeddings of the instances in the training set ( $D$ ) and analyzed the change of document embeddings

before and after pretraining. For each document  $d_i \in D$ , there were three document embeddings generated by the following models:

- $r_i$ : Default encoder without any modification
- $p_i$ : Encoder after pretraining
- $q_i$ : Encoder after pretraining and fine-tuning

As described in the previous subsection, both the MLM and classification model architecture contain an encoder, and all the models contained an encoder of the same architecture. The encoder converted each document into an  $n \times m$  embedding matrix, where  $n$  is the maximum sequence size and  $m$  is the dimension of the token embeddings. For each topic, we computed the cosine similarity of the embedding pairs  $(r_i, p_i)$  and  $(p_i, q_i)$  in the training set and then analyzed the distribution of cosine similarities by histogram visualization. Our intuition was that effective pretraining strategies would be reflected by observable shifts in the document embeddings, which would be discernible from the histograms. Significant shifts in the document embeddings before and after pretraining would suggest that the models can learn new information from the pretraining data, which can benefit the downstream tasks. Otherwise, further pretraining would be unlikely to improve the performance on the downstream tasks.

## **Experiments**

### Data preprocessing

To reduce the noise in the Twitter data, we used the open source tool *preprocess-twitter* for data preprocessing.<sup>47</sup> The preprocessing includes lowercasing, normalization of numbers, usernames, urls, hashtags and text smileys, and adding extra marks for capital

words, hashtags and repeated letters. Web content from OpenWebText and research articles from PubMed were chunked into sentences and then applied the same preprocessing.

## Experimental setup

For MLM, we initialized the models RoBERTa\_Base and BERTweet, respectively, and set the learning rate to  $4^{e-4}$ , the batch size as 4096, and the warm-up ratio as 0.06. The rest of hyper-parameters were the same as those for pretraining RoBERTa\_Base.<sup>15</sup> We trained each model for 100 epochs and used the model from the last checkpoint for fine-tuning. For classification, we performed a limited parameter search with the learning rate  $\in \{2 \times 10^{-5}, 3 \times 10^{-5}\}$  and fine-tuned each model for 10 epochs. The rest of hyper-parameters were empirically chosen and are shown in the supplementary material. Because initialization can have a significant impact on convergence in training deep neural networks, we ran each experiment three times with different random initializations. The model that achieved the median performance over the test set was selected to conduct the statistical significance test and report the result.

## IMPLEMENTATION AND RESULTS

### Comparison of pretrained models

Table 2 presents the performance metrics for the five transformer-based models on each task. On most tasks, RoBERTa and BERTweet had comparable performances, and BERTweet outperformed TwitterBERT. BERTweet performed statistically significantly better than all others on two tasks, and RoBERTa performed statistically significantly

better than all others on one task. Although both of BERTweet and TwitterBERT were pretrained on Twitter data, the number of tweets used to train TwitterBERT (0.9B tokens) was much smaller than BERTweet (16B tokens), which is likely to be the reason of the differences in their performances. BioClinical\_BERT and BioBERT consistently underperformed on all tasks compared to RoBERTa and BERTweet, despite having undergone DAPT.

| Task                                                                | RoBERTa                    | BERTweet                   | Twitter BERT        | BioClinical BERT    | BioBERT             |
|---------------------------------------------------------------------|----------------------------|----------------------------|---------------------|---------------------|---------------------|
| ADR Detection                                                       | 60.6<br>[50.7-64.5]        | <b>64.5</b><br>[58.4-70.6] | 57.6<br>[50.6-64.8] | 58.9<br>[51.7-65.3] | 60.2<br>[53.4-66.9] |
| Breast Cancer                                                       | <b>88.5</b><br>[85.2-90.3] | 87.4<br>[84.5-90.2]        | 86.3<br>[83.3-89.1] | 83.0<br>[79.4-85.8] | 83.9<br>[80.4-86.9] |
| NPMU                                                                | 61.8<br>[54.1-61.5]        | <b>64.9</b><br>[61.5-68.9] | 59.5<br>[56.0-63.3] | 56.8<br>[53.3-60.6] | 52.7<br>[49.2-56.4] |
| WNUT-20-task2 (COVID-19)                                            | 88.7<br>[87.0-90.9]        | <b>88.8</b><br>[86.2-90.9] | 87.1<br>[84.7-89.2] | 86.1<br>[83.9-88.4] | 87.4<br>[85.1-89.6] |
| SMM4H-17-task1 (ADR detection)                                      | <b>53.4</b><br>[47.7-55.5] | 50.7<br>[46.6-54.7]        | 47.6<br>[43.3-51.3] | 45.5<br>[41.5-49.1] | 44.5<br>[40.6-48.4] |
| SMM4H-17-task2 (Medication consumption)                             | 79.2<br>[76.9-79.1]        | <b>79.8</b><br>[78.8-80.8] | 77.6<br>[76.6-78.7] | 74.7<br>[73.6-75.7] | 75.2<br>[74.2-76.3] |
| SMM4H-21-task1 (ADR detection)                                      | <b>71.8</b><br>[62.1-80.4] | 66.2<br>[55.7-74.8]        | 64.9<br>[53.0-73.9] | 64.9<br>[53.2-73.6] | 62.7<br>[51.0-72.3] |
| SMM4H-21-task3a (Regimen change on Twitter)                         | <b>62.1</b><br>[55.1-68.8] | 57.6<br>[50.7-64.7]        | 54.0<br>[46.4-60.9] | 53.6<br>[46.3-60.6] | 55.0<br>[48.1-61.8] |
| SMM4H-21-task3b (Regimen change on WebMD)                           | <b>88.6</b><br>[86.9-90.1] | 87.6<br>[85.8-89.2]        | 87.7<br>[85.9-89.4] | 86.7<br>[84.8-88.5] | 87.1<br>[85.3-88.9] |
| SMM4H-21-task4 (Adverse pregnancy outcomes)                         | <b>89.5</b><br>[87.0-91.4] | 88.8<br>[86.4-91.1]        | 88.4<br>[86.3-90.7] | 83.4<br>[80.4-86.0] | 83.3<br>[80.4-85.9] |
| SMM4H-21-task5 (COVID-19 potential case)                            | <b>75.5</b><br>[68.9-81.0] | 71.0<br>[64.6-76.8]        | 70.9<br>[64.2-76.8] | 65.0<br>[57.8-71.7] | 66.4<br>[59.0-72.9] |
| SMM4H-21-task6 (COVID-19 symptom)                                   | 98.0<br>[96.6-99.2]        | <b>98.2</b><br>[97.0-99.2] | 97.8<br>[96.4-99.0] | 97.8<br>[96.4-99.0] | 98.2<br>[97.0-99.2] |
| Suicidal Ideation Detection                                         | <b>64.6</b><br>[60.4-68.6] | 63.3<br>[59.3-67.3]        | 59.8<br>[56.0-64.0] | 61.7<br>[57.4-65.7] | 61.7<br>[57.4-66.1] |
| Drug Addiction and Recovery Intervention                            | <b>74.0</b><br>[70.4-77.5] | 71.9<br>[68.2-75.2]        | 69.9<br>[66.2-73.4] | 69.7<br>[66.2-73.4] | 69.7<br>[66.1-73.2] |
| eRisk-21-task1 (Signs of Pathological Gambling)                     | <b>75.0</b><br>[59.1-87.7] | 67.9<br>[52.0-81.1]        | 70.2<br>[54.5-81.8] | 68.1<br>[50.0-82.1] | 62.7<br>[45.5-76.4] |
| eRisk-21-task2 (Signs of Self-Harm)                                 | <b>49.3</b><br>[34.4-62.9] | 48.6<br>[32.8-61.8]        | 49.2<br>[34.0-64.0] | 40.0<br>[25.9-53.3] | 45.2<br>[27.6-60.0] |
| Sentiment Analysis in e-Health Forums (Food Allergy Related)        | <b>76.4</b><br>[70.2-82.7] | 74.3<br>[68.1-80.6]        | 71.2<br>[64.4-77.5] | 71.7<br>[65.4-77.5] | 74.9<br>[68.6-80.6] |
| Sentiment Analysis in e-Health Forums (Crohn's Disease Related)     | <b>79.2</b><br>[74.4-83.6] | 78.2<br>[73.5-82.6]        | 75.4<br>[70.7-79.8] | 75.7<br>[71.3-80.1] | 75.7<br>[71.0-80.1] |
| Sentiment Analysis in e-Health Forums (Breast Cancer Related)       | <b>75.2</b><br>[68.3-81.4] | 70.8<br>[63.4-77.6]        | 72.7<br>[65.8-79.5] | 73.9<br>[67.1-80.1] | 70.2<br>[62.7-77.6] |
| Factuality Classification in e-Health Forums (Food Allergy Related) | <b>78.0</b><br>[71.1-83.6] | 76.1<br>[69.2-82.4]        | 76.1<br>[69.2-83.0] | 70.4<br>[62.9-77.4] | 76.7<br>[69.8-83.6] |



|                                                                        |                            |                            |                     |                     |                     |
|------------------------------------------------------------------------|----------------------------|----------------------------|---------------------|---------------------|---------------------|
| Factuality Classification in e-Health Forums (Crohn'S Disease Related) | <b>85.4</b><br>[81.7-89.2] | 84.2<br>[80.2-88.2]        | 84.8<br>[81.1-88.5] | 82.4<br>[78.0-86.1] | 81.4<br>[77.1-85.4] |
| Factuality Classification in e-Health Forums (Breast Cancer Related)   | 75.2<br>[67.7-82.0]        | <b>77.0</b><br>[70.2-83.2] | 74.5<br>[67.1-80.7] | 75.8<br>[68.9-82.0] | 72.0<br>[64.6-78.9] |

**Table 2.** Comparison of five pretraining strategies on 22 text classification tasks. The metric for each task is shown along with 95% confidence intervals. The best model for each task is highlighted in boldface. Models that are statistically significantly better than all other models on the same task are underlined.

## Pretraining results

Table 3 shows the performances obtained on three tasks by models further pretrained on data selected by the different strategies mentioned in the previous section, representing SAPT, DAPT, and TSPT. The table shows that models further pretrained on tweets (SAPT) performed better or comparable to the baseline/off-the-shelf models (RoBERTa\_Base and BERTtweet), and significantly outperformed the models pretrained on biomedical research papers (DAPT), even with relatively small datasets for extended pretraining. In contrast, there is no statistically significant differences between using the on-topic data and the off-topic data from the same source for the smaller TSPT datasets (*ie.*, 298K, 586K, and 272K). However, when pretrained using larger datasets (1M), the table shows that the models pretrained on the on-topic data generally obtained better performances than the models pretrained on the off-topic data from the same source, with significantly better performance for the NPMU task. This illustrates that pretraining on data related to the same topic (TSPT) may be effective in some cases. The table also shows that RoBERTa\_Base tends to benefit more from SAPT than BERTtweet. This may be attributed to the fact that RoBERTa\_Base was initially pretrained on generic text while BERTtweet was initially pretrained on tweets, and thus RoBERTa\_Base can gain more new information from further pretraining on Twitter data compared to BERTtweet. The best

performance achieved for each of these three tasks is higher than those reported in past literature. We present the implications of these findings in the Discussion section.

| Continual Pretraining Data   | Initial Model | Breast Cancer              |                            | NPMU                       |                            | COVID-19                   |                            |
|------------------------------|---------------|----------------------------|----------------------------|----------------------------|----------------------------|----------------------------|----------------------------|
| OpenWebText (generic)        | RB            | 87.6<br>[84.8-90.2]        | 87.3<br>[84.4-90.4]        | 59.5<br>[55.4-63.1]        | 57.2<br>[53.5-61.1]        | 89.2<br>[87.1-91.3]        | 88.5<br>[86.2-90.6]        |
|                              | BT            | 86.5<br>[83.3-89.2]        | 87.1<br>[84.1-89.8]        | 61.6<br>[57.8-65.3]        | 62.1<br>[58.2-65.2]        | 88.5<br>[86.4-90.7]        | 87.9<br>[85.8-90.1]        |
| Twitter+off-topic (SAPT)     | RB            | 87.5<br>[84.5-90.1]        | 86.4<br>[83.7-89.2]        | <u>65.2</u><br>[61.5-68.6] | <u>64.7</u><br>[59.0-66.5] | <u>90.8</u><br>[88.8-92.6] | 89.2<br>[87.0-91.2]        |
|                              | BT            | 86.9<br>[83.9-89.4]        | 87.6<br>[84.7-90.3]        | 65.7<br>[62.3-69.0]        | 64.7<br>[61.4-67.9]        | <u>90.2</u><br>[88.0-92.1] | 90.1<br>[88.2-92.1]        |
| Twitter+on-topic (SAPT+TSPT) | RB            | <b>89.7</b><br>[87.1-92.0] | 88.9<br>[86.0-91.5]        | <u>65.8</u><br>[62.5-69.2] | <u>66.0</u><br>[63.2-70.0] | <u>90.5</u><br>[88.4-92.1] | <u>91.2</u><br>[89.2-92.9] |
|                              | BT            | 89.1<br>[86.4-91.6]        | <u>89.5</u><br>[86.9-92.1] | 66.7<br>[63.5-69.9]        | <b>68.0</b><br>[64.7-71.4] | <u>90.5</u><br>[88.4-92.4] | <u>91.1</u><br>[89.1-93.0] |
| PubMed+off-topic (DAPT)      | RB            | 85.1<br>[81.9-88.1]        | -                          | 55.8<br>[51.9-59.3]        | -                          | 89.0<br>[87.0-91.2]        | -                          |
|                              | BT            | 85.9<br>[83.0-88.7]        | -                          | 58.8<br>[55.2-62.1]        | -                          | 88.8<br>[87.0-91.0]        | -                          |
| PubMed+on-topic (DAPT+TSPT)  | RB            | 85.8<br>[82.7-88.7]        | -                          | 58.6<br>[55.1-62.4]        | -                          | 89.8<br>[87.7-91.7]        | -                          |
|                              | BT            | 86.9<br>[84.0-89.5]        | -                          | 60.2<br>[56.6-64.0]        | -                          | 89.2<br>[87.1-91.3]        | -                          |
| <b>Data size</b>             | -             | 298K                       | 1M                         | 586K                       | 1M                         | 272K                       | 1M                         |

**Table 3.** Performance metrics obtained by models after pretraining on different data collections. The metric for breast cancer and COVID-19 is the  $F_1$ -score of the positive class, and the metric for NPMU is the  $F_1$ -score for the non-medical use class. RB and BT denote RoBERTa and BERTweet, respectively. Data sizes for extended pretraining are shown at the bottom. The best model for each task is shown in boldface. The models underlined are statistically significantly better than their initial models (*ie.*, RoBERTa and BERTweet without continual pretraining in Table 2).

### Document embedding transfer results

Figure 2 visualizes the changes in document embeddings following pretraining and fine-tuning for the three datasets. As we can see, for each type of pretraining dataset, the cosine similarities of the document embeddings before and after pretraining are mostly greater than 0.8, while those of the document embeddings before and after fine-tuning are mostly smaller than 0.6, with a wider spread. This suggests that the embeddings changed substantially after fine-tuning on the classification task compared to the initial pretraining. The same document can be encoded in very different ways depending on what task the model is trained on. The figure also shows that for the breast cancer and

COVID-19 tasks, the cosine similarities of the document embeddings before and after pretraining are mostly greater than 0.9. This indicates that the document embeddings hardly changed by pretraining for the breast cancer and COVID-19 tasks. In comparison, for NPMU, the cosine similarities for pretraining show a less concentrated distribution. The large shifts in document embeddings for the NPMU may be one of the reasons for the statistically significant improvement in performance for this task, as depicted in Table 3.

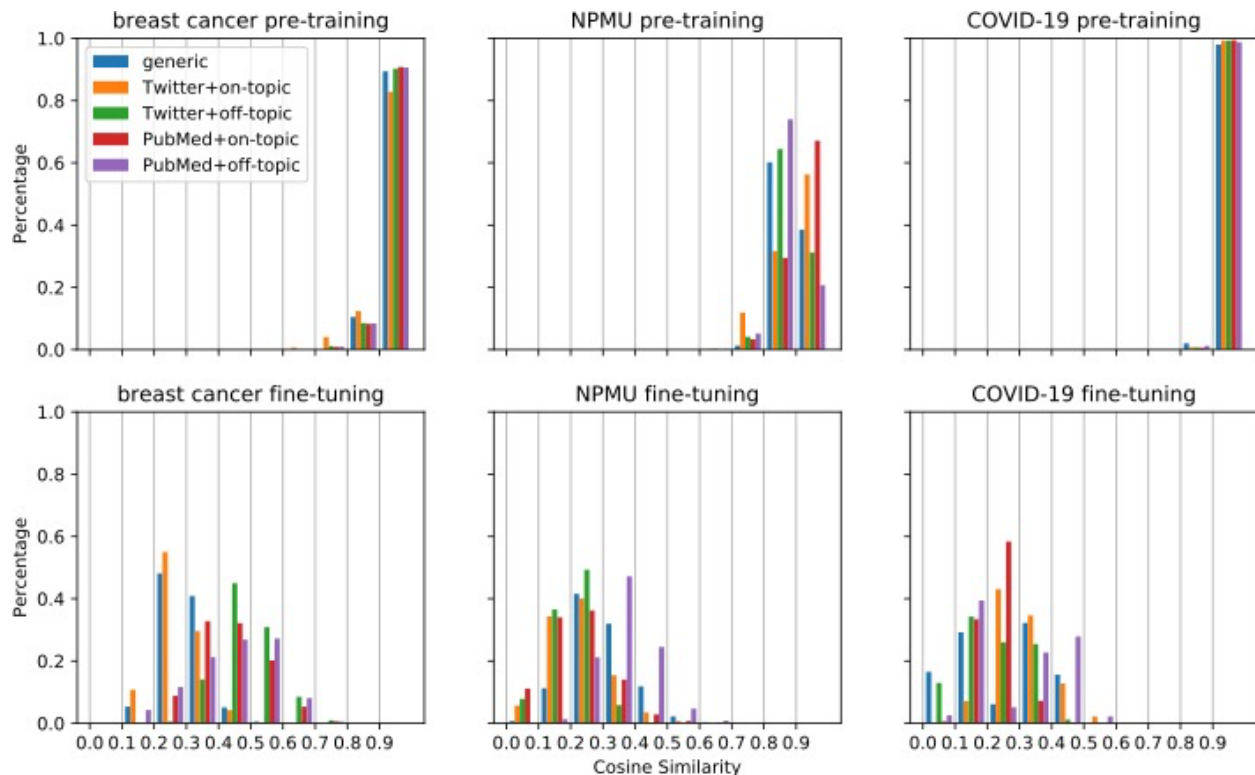

**Figure 2.** Histograms of the distributions of cosine similarities for the models initialized from RoBERTa\_Base and pretrained on 298K, 586K, and 272K samples for the breast cancer, NPMU, and COVID-19 tasks, respectively.

## DISCUSSION

The consistent high performance of RoBERTa suggests that models pretrained on generic text can still achieve good performance on domain specific social media-based NLP tasks, specifically text classification, and may counterintuitively outperform models pretrained

on in-domain (medical) data. The better performance of RoBERTa can be attributed to larger training data, longer training periods and better optimization of hyperparameters. Thus, models pretrained on generic text can be a good choice particularly when sufficient domain specific data or computational resources are not available. The relative underperformances of BioClinical\_BERT and BioBERT suggest that the effectiveness of DAPT for social media-based health-related text classification tasks can be limited, which may be because of the considerable gap between the languages of the pretraining data and the target tasks (*ie*, clinical/biomedical language *vs.* social media language).

The results in Table 3 illustrate that pretraining on data from the same source (SAPT) and pretraining on data related to the same topic (TSPT) as the target task can be an effective approach for social media-based health-related text classification tasks. However, the effectiveness of SAPT and TSPT differed among three tasks. The most likely possibility for this is that the NPMU task had the most room to improve since the gap between IAA ( $K=0.86$ ) and classifier performance (initial  $F_1$ -score= $0.649$ ) for this task was much bigger than those of the other two (breast cancer:  $0.85$  *vs.*  $0.892$ ; COVID-19:  $0.80$  *vs.*  $0.897$ ). Although IAA and F-scores are not directly comparable, the differences in the values here clearly show the sub-optimal classification performance for the NPMU task. Thus, future researchers may find TSPT to be effective when classification performance is considerably lower compared to IAA.

We also investigated the potential reasons for the difference by exploring the transfer of the document embeddings for pretraining and fine-tuning. As illustrated in Figure 2, we observed that for breast cancer and COVID-19, the embedding similarities of different models have the similar distribution after pretraining on different data, mostly

between 0.9 and 1. In comparison, for the NPMU task, the embedding similarities of change considerably. This observation may provide a visual explanation for the different performances of the same strategy on different tasks. For the breast cancer and COVID-19 tasks, the document embeddings did not change much after pretraining, indicating that the models poorly learned new information. One possible reason for this finding might be that when taking MLM as the training goal, the initial model may be optimal enough to encode the data and may not need extra data. This interpretation is consistent with the pretraining results with larger data in Table 3, which shows that increasing the size of pretraining data does not significantly improve the performance on the breast cancer and COVID-19 tasks, while for the NPMU task, the performance was improved by TSPT with larger data. For the NPMU task, the model representations may have been incomplete and needed more data to improve the representation. Visual analysis, such as the one presented in this paper, may be an efficient strategy to decide how much pretraining data is needed for future studies attempting similar supervised text classification tasks.

### **Implications for informatics research**

With the rapidly growing inclusion of social media texts for conducting health-related studies, it is imperative to identify NLP strategies that are likely to produce the best results. In most research settings, it is not possible to execute all the different types of pretraining we described in this paper. Also, as reported in recent research, conducting large-scale training/pretraining has associated environmental costs,<sup>48,49</sup> and the establishment of effective strategies can significantly lower such costs in future research. Our findings in this paper reveal some simple but effective strategies for improving social media-based

health-related text classification tasks. First, large generic models such as RoBERTa and source-specific models such as BERTweet can produce excellent performances in most social media-based text classification tasks. Second, SAPT and TSPT to extend existing pretrained models such as RoBERTa and BERTweet can further improve performance, and they may be particularly useful when existing pretrained models exhibit relative under-performance on a given task. Third, DAPT may not be very effective in improving classification performance for social media tasks, which may have a higher cost-benefit trade-off ratio than SAPT and TSPT. Also, SAPT and TSPT are easy to implement and only require unannotated data. For example, SAPT can be implemented by randomly selecting data from the same source, and TSPT can be implemented by data filtering using topic-related keywords. While our experiments focused solely on text classification tasks, it is likely that these findings will be relevant for other NLP tasks such as information extraction or named entity recognition.

## **CONCLUSIONS**

We benchmarked the performances of five pretrained transformer-based models on 22 health-related classification tasks involving social media text. We found that RoBERTa and BERTweet perform similarly on most datasets, consistently outperforming BioClinical\_BERT and BioBERT. In addition, we found that pretraining on the data from the same source as the target task (SAPT), in this case social media data, is more effective than pretraining on domain-specific data (DAPT), such as texts retrieved from PubMed. We also found that topic-specific pretraining (TSPT) may in some cases further improve performance, although this strategy may not be as effective as SAPT. Broadly speaking,

our experiments suggest that for social media-based classification tasks, it is best to use pretrained models generated from large social media text, and further pretraining on topic-specific data may improve model performances.

## FUNDING

Research reported in this publication was supported in part by the National Institute on Drug Abuse (NIDA) of the National Institutes of Health (NIH) under award number R01DA046619. The content is solely the responsibility of the authors and does not necessarily represent the official views of the NIH.

## AUTHOR CONTRIBUTIONS

YGuo conducted the benchmarking and pretraining experiments. YGe assisted in conducting the study. YY, MAG and AS helped in formulating the study and providing supervision. All authors contributed to the writing of the manuscript.

## CONFLICT OF INTEREST

None declared

## REFERENCES

1. Aggarwal CC, Zhai C. A Survey of Text Classification Algorithms. In: Aggarwal C, Zhai C, eds. *Mining Text Data*. Vol 9781461432. Springer, Boston, MA; 2012:163-222. doi:10.1007/978-1-4614-3223-4\_6
2. Shah FP, Patel V. A review on feature selection and feature extraction for text classification. *Proc 2016 IEEE Int Conf Wirel Commun Signal Process Networking, WiSPNET 2016*. Published online September 2016:2264-2268. doi:10.1109/WISPNET.2016.7566545
3. Uysal AK, Gunal S. A novel probabilistic feature selection method for text classification. *Knowledge-Based Syst*. 2012;36:226-235. doi:10.1016/J.KNOSYS.2012.06.005
4. Yang S, Ding Z, Jian H, Councill IG, Hongyuan Z, Giles CL. Boosting the feature space: Text classification for unstructured data on the web. In: *Proceedings - IEEE International Conference on Data Mining, ICDM*. IEEE; 2006:1064-1069. doi:10.1109/ICDM.2006.31
5. Gao L, Zhou S, Guan J. Effectively classifying short texts by structured sparse representation with dictionary filtering. *Inf Sci (Ny)*. 2015;323:130-142. doi:10.1016/J.INS.2015.06.033

6. Cortes C, Vapnik V. Support-vector networks. *Mach Learn.* 1995;20(3):273-297. doi:10.1007/bf00994018
7. Ho TK. Random decision forests. In: *Proceedings of the International Conference on Document Analysis and Recognition, ICDAR.* Vol 1. IEEE Computer Society; 1995:278-282. doi:10.1109/ICDAR.1995.598994
8. Walker SH, Duncan DB. Estimation of the Probability of an Event as a Function of Several Independent Variables. *Biometrika.* 1967;54(1/2):167. doi:10.2307/2333860
9. McCray AT, Aronson AR, Browne AC, Rindfleisch TC, Razi A, Srinivasan S. UMLS® knowledge for biomedical language processing. *Bull Med Libr Assoc.* 1993;81(2):184-194.
10. N A, F D, A A. Classification of Biomedical Texts for Cardiovascular Diseases with Deep Neural Network Using a Weighted Feature Representation Method. *Healthc (Basel, Switzerland).* 2020;8(4). doi:10.3390/HEALTHCARE8040392
11. Wu S, Roberts K, Datta S, et al. Deep learning in clinical natural language processing: a methodical review. *J Am Med Informatics Assoc.* 2020;27(3):457-470. doi:10.1093/JAMIA/OCZ200
12. Mikolov T, Chen K, Corrado G, Dean J. Distributed Representations of Words and Phrases and their Compositionality. *Nips.* Published online 2013:1-9. doi:10.1162/jmlr.2003.3.4-5.951
13. Pennington J, Socher R, Manning CD. Glove: Global Vectors for Word Representation. Published online 2014:1532-1543. doi:10.3115/V1/D14-1162
14. Devlin J, Chang M-W, Lee K, Google KT, Language AI. BERT: Pre-training of Deep Bidirectional Transformers for Language Understanding. In: *Proceedings of NAACL-HLT.* ; 2019:4171-4186.
15. Liu Y, Ott M, Goyal N, et al. RoBERTa: A robustly optimized BERT pretraining approach. *arXiv.* 2019;(1).
16. Lee J, Yoon W, Kim S, et al. BioBERT: a pre-trained biomedical language representation model for biomedical text mining. Wren J, ed. *Bioinformatics.* Published online September 2019. doi:10.1093/bioinformatics/btz682
17. Alsentzer E, Murphy JR, Boag W, et al. *Publicly Available Clinical BERT Embeddings.*; 2019.
18. Leroy G, Gu Y, Pettygrove S, Kurzius-Spencer M. Automated Lexicon and Feature Construction Using Word Embedding and Clustering for Classification of ASD Diagnoses Using EHR BT - Natural Language Processing and Information Systems. In: Frasinca F, Ittoo A, Nguyen LM, Métais E, eds. Springer International Publishing; 2017:34-37.
19. Gururangan S, Marasovi' cmarasovi' c A, Swayamdipta S, et al. Don't Stop Pretraining: Adapt Language Models to Domains and Tasks. In: *Proceedings of the 58th Annual Meeting of the Association for Computational Linguistics.* ; 2020:8342-8360.



20. Dai X, Karimi S, Hachey B, Paris C. Cost-effective Selection of Pretraining Data: A Case Study of Pretraining BERT on Social Media. In: Association for Computational Linguistics (ACL); 2020:1675-1681. doi:10.18653/v1/2020.findings-emnlp.151
21. Guo Y, Dong X, Al-Garadi MA, Sarker A, Paris C, Mollá-Aliod D. Benchmarking of Transformer-Based Pre-Trained Models on Social Media Text Classification Datasets. In: *Proceedings of the The 18th Annual Workshop of the Australasian Language Technology Association.* ; 2020:86-91.
22. Nguyen DQ, Vu T, Tuan Nguyen A. BERTweet: A pre-trained language model for English Tweets. In: Association for Computational Linguistics (ACL); 2020:9-14. doi:10.18653/v1/2020.emnlp-demos.2
23. Qudar MMA, Mago V. TweetBERT: A Pretrained Language Representation Model for Twitter Text Analysis. Published online 2020:1-12. <http://arxiv.org/abs/2010.11091>
24. Conway M, Hu M, Chapman WW. Recent Advances in Using Natural Language Processing to Address Public Health Research Questions Using Social Media and ConsumerGenerated Data. *Yearb Med Inform.* 2019;28(1):208-217. doi:10.1055/s-0039-1677918
25. Gonzalez-Hernandez G, Sarker A, O'Connor K, Savova G. Capturing the Patient's Perspective: a Review of Advances in Natural Language Processing of Health-Related Text. *Yearb Med Inform.* 2017;26(1):214-227. doi:10.15265/IY-2017-029
26. Paul MJ, Sarker A, Brownstein JS, et al. Social media mining for public health monitoring and surveillance. In: *Pacific Symposium on Biocomputing.* World Scientific Publishing Co. Pte Ltd; 2016:468-479. doi:10.1142/9789814749411\_0043
27. Névéol A, Dalianis H, Velupillai S, Savova G, Zweigenbaum P. Clinical Natural Language Processing in languages other than English: Opportunities and challenges. *J Biomed Semantics.* 2018;9(1):12. doi:10.1186/s13326-018-0179-8
28. Perera S, Sheth A, Thirunarayan K, Nair S, Shah N. Challenges in understanding clinical notes: Why NLP engines fall short and where background knowledge can help. In: *International Conference on Information and Knowledge Management, Proceedings.* ; 2013:21-26. doi:10.1145/2512410.2512427
29. Sarker A, Gonzalez G. Portable automatic text classification for adverse drug reaction detection via multi-corpus training. *J Biomed Inform.* 2015;53. doi:10.1016/j.jbi.2014.11.002
30. Salazar J, Liang D, Nguyen TQ, Kirchhoff K. Masked Language Model Scoring. In: *Proceedings of the 58th Annual Meeting of the Association for Computational Linguistics.* Association for Computational Linguistics; 2020:2699-2712. doi:10.18653/v1/2020.acl-main.240
31. Sarker A, Al-Garadi MA, Yang Y-C, et al. Automatic Breast Cancer Survivor Detection from Social Media for Studying Latent Factors Affecting Treatment Success. *medRxiv.* Published online May 2020:2020.05.17.20104778.

doi:10.1101/2020.05.17.20104778

32. Al-Garadi MA, Yang YC, Cai H, et al. Text classification models for the automatic detection of nonmedical prescription medication use from social media. *BMC Med Inform Decis Mak*. 2021;21(1):1-13. doi:10.1186/s12911-021-01394-0
33. Nguyen DQ, Vu T, Rahimi A, Dao MH, Nguyen LT, Doan L. WNUT-2020 Task 2: Identification of Informative COVID-19 English Tweets. In: *Online*. Association for Computational Linguistics (ACL); 2020:314-318. doi:10.18653/v1/2020.wnut-1.41
34. Sarker A, Belousov M, Friedrichs J, et al. Data and systems for medication-related text classification and concept normalization from Twitter: Insights from the Social Media Mining for Health (SMM4H)-2017 shared task. *J Am Med Informatics Assoc*. 2018;25(10). doi:10.1093/jamia/ocy114
35. Klein AZ, Gonzalez-Hernandez G. An annotated data set for identifying women reporting adverse pregnancy outcomes on Twitter. *Data Br*. 2020;32:106249. doi:10.1016/J.DIB.2020.106249
36. Magge A, Klein AZ, Miranda-Escalada A, et al. *Overview of the Sixth Social Media Mining for Health Applications (#SMM4H) Shared Tasks at NAACL 2021.*; 2021.
37. Gaur M, Aribandi V, Alambo A, et al. Characterization of time-variant and time-invariant assessment of suicidality on Reddit using C-SSRS. De Luca V, ed. *PLoS One*. 2021;16(5):e0250448. doi:10.1371/journal.pone.0250448
38. Ghosh S, Misra J, Ghosh S, Podder S. Utilizing Social Media for Identifying Drug Addiction and Recovery Intervention. *Proc - 2020 IEEE Int Conf Big Data, Big Data 2020*. Published online 2020:3413-3422. doi:10.1109/BigData50022.2020.9378092
39. Parapar J, Martín-Rodilla P, Losada DE, Crestani F. eRisk 2021: Pathological Gambling, Self-harm and Depression Challenges. In: Hiemstra D, Moens M-F, Mothe J, Perego R, Potthast M, Sebastiani F, eds. *Advances in Information Retrieval*. Springer International Publishing; 2021:650-656.
40. Carrillo-de-Albornoz J, Rodriguez Vidal J, Plaza L. Feature engineering for sentiment analysis in e-health forums. *PLoS One*. 2018;13(11):e0207996.
41. Al-Garadi MA, Yang Y-C, Lakamana S, et al. *Automatic Breast Cancer Cohort Detection from Social Media for Studying Factors Affecting Patient-Centered Outcomes*. Vol 12299 LNAI.; 2020. doi:10.1007/978-3-030-59137-3\_10
42. Sarker A, Lakamana S, Hogg-Bremer W, Xie A, Al-Garadi MA, Yang Y-C. Self-reported COVID-19 symptoms on Twitter: an analysis and a research resource. *J Am Med Informatics Assoc*. 2020;27(8):1310-1315. doi:10.1093/jamia/ocaa116
43. Koehn P. Statistical significance tests for machine translation evaluation. In: *Proceedings of the 2004 Conference on Empirical Methods in Natural Language Processing*. ; 2004:388-395.
44. Peters ME, Neumann M, Iyyer M, et al. Deep contextualized word representations. In: *NAACL HLT 2018 - 2018 Conference of the North American*

- Chapter of the Association for Computational Linguistics: Human Language Technologies - Proceedings of the Conference*. Vol 1. Association for Computational Linguistics (ACL); 2018:2227-2237. doi:10.18653/v1/n18-1202
45. Tenney I, Xia P, Chen B, et al. What do you learn from context? Probing for sentence structure in contextualized word representations. *7th Int Conf Learn Represent ICLR 2019*. Published online May 2019.
  46. Hewitt J, Manning CD. A Structural Probe for Finding Syntax in Word Representations. In: *Proceedings of the 2019 Conference of the North American Chapter of the Association for Computational Linguistics: Human Language Technologies*. Association for Computational Linguistics; 2019:4129-4138. doi:10.18653/v1/N19-1419
  47. Paulus R, Pennington J. Script for preprocessing tweets. Accessed August 23, 2021. <https://nlp.stanford.edu/projects/glove/preprocess-twitter.rb>
  48. Strubell E, Ganesh A, McCallum A. Energy and Policy Considerations for Modern Deep Learning Research. *Proc AAAI Conf Artif Intell*. 2020;34(09):13693-13696. doi:10.1609/aaai.v34i09.7123
  49. Schwartz R, Dodge J, Smith NA, Etzioni O. Green AI. *Commun ACM*. 2020;63(12):54–63. doi:10.1145/3381831
