# Supplementary material for: Comparison of pretraining models and strategies for health-related social media text classification
Source: bioRxiv or medRxiv preprint supplement (doi:10.1101/2021.09.28.21264253), 2021-09-30
Supplement: Supplementary file [file media-1.pdf]

## SUPPLEMENTARY MATERIAL

### Appendix I

Each of RoBERTa, BERTweet, and BioBERT has multiple implementations which differ in the model size, the pre-training data size, and the training time. The specific models for RoBERTa, BERTweet and BioBERT we used in our experiments are RoBERTa\_Base, BERTweet\_Base and BioBERT v1.1.

### Appendix II

| Hyper-parameter       |                    |
|-----------------------|--------------------|
| Number of Layers      | 12                 |
| Hidden size           | 768                |
| FFN inner hidden size | 3072               |
| Attention heads       | 12                 |
| Attention head size   | 64                 |
| Dropout               | 0.1                |
| Attention Dropout     | 0.1                |
| Weight Decay          | 0.01               |
| Learning Rate Decay   | Linear             |
| Adam $\beta_1$        | 0.9                |
| Adam $\beta_2$        | 0.98               |
| Gradient Clipping     | 0                  |
| Batch Size            | 32                 |
| Warmup Ratio          | 0                  |
| Adam Epsilon          | $1 \times 10^{-8}$ |

**Table 1.** The full hyper-parameter configurations of the classification model. The maximum sequence size of each model is set as the same as the off-the-shelf model, which is 128 for BERTweet and 512 for the rest models.

### Appendix III

| ID | Task                  | Link                                                                                                                                                                                                                                                     |
|----|-----------------------|----------------------------------------------------------------------------------------------------------------------------------------------------------------------------------------------------------------------------------------------------------|
| 1  | ADR Detection         | <a href="http://diego.asu.edu/Publications/ADRClassify.html">http://diego.asu.edu/Publications/ADRClassify.html</a>                                                                                                                                      |
| 2  | Breast Cancer         | <a href="https://healthlanguageprocessing.org/smm4h-2021/task-8/">https://healthlanguageprocessing.org/smm4h-2021/task-8/</a><br>Data also available from: <a href="https://sarkerlab.org/blogs/smm-bc.html">https://sarkerlab.org/blogs/smm-bc.html</a> |
| 3  | NPMU characterization | Dataset is currently protected due to the sensitive nature of the posts (based on suggestions by the funding body—National Institute on Drug Abuse). Data will be made available upon request                                                            |

|    |                                                                 |                                                                                                                                                           |
|----|-----------------------------------------------------------------|-----------------------------------------------------------------------------------------------------------------------------------------------------------|
|    |                                                                 | following a data use agreement (DUA). Please email the PI Abeer Sarker at <a href="mailto:abeed@dbmi.emory.edu">abeed@dbmi.emory.edu</a> for data access. |
| 4  | WNUT-20-task2 (informative COVID-19 tweet detection)            | <a href="https://github.com/VinAIRResearch/COVID19Tweet">https://github.com/VinAIRResearch/COVID19Tweet</a>                                               |
| 5  | SMM4H-17-task1 (ADR detection)                                  | <a href="https://healthlanguageprocessing.org/sharedtask2/">https://healthlanguageprocessing.org/sharedtask2/</a>                                         |
| 6  | SMM4H-17-task2 (medication consumption)                         |                                                                                                                                                           |
| 7  | SMM4H-21-task1 (ADR detection)                                  | <a href="https://healthlanguageprocessing.org/smm4h-2021/task-1/">https://healthlanguageprocessing.org/smm4h-2021/task-1/</a>                             |
| 8  | SMM4H-21-task3a (regimen change on Twitter)                     | <a href="https://healthlanguageprocessing.org/smm4h-2021/task-3/">https://healthlanguageprocessing.org/smm4h-2021/task-3/</a>                             |
| 9  | SMM4H-21-task3b (regimen change on WebMD)                       |                                                                                                                                                           |
| 10 | SMM4H-21-task4 (adverse pregnancy outcomes)                     | <a href="https://healthlanguageprocessing.org/smm4h-2021/task-4/">https://healthlanguageprocessing.org/smm4h-2021/task-4/</a>                             |
| 11 | SMM4H-21-task5 (COVID-19 potential case)                        | <a href="https://healthlanguageprocessing.org/smm4h-2021/task-5/">https://healthlanguageprocessing.org/smm4h-2021/task-5/</a>                             |
| 12 | SMM4H-21-task6 (COVID-19 symptom)                               | <a href="https://healthlanguageprocessing.org/smm4h-2021/task-6/">https://healthlanguageprocessing.org/smm4h-2021/task-6/</a>                             |
| 13 | Suicidal Ideation Detection                                     | <a href="https://zenodo.org/record/4278895#.YT_KL1PokWo">https://zenodo.org/record/4278895#.YT_KL1PokWo</a>                                               |
| 14 | Drug Addiction and Recovery Intervention                        | <a href="https://zenodo.org/record/4543776#.YUJW-FPokWo">https://zenodo.org/record/4543776#.YUJW-FPokWo</a>                                               |
| 15 | eRisk-21-task1 (Signs of Pathological Gambling)                 | <a href="https://early.irlab.org/">https://early.irlab.org/</a>                                                                                           |
| 16 | eRisk-21-task2 (Signs of Self-Harm)                             |                                                                                                                                                           |
| 17 | Sentiment Analysis in e-Health Forums (Food Allergy Related)    | <a href="https://zenodo.org/record/1479354#.YVHTeFPokWo">https://zenodo.org/record/1479354#.YVHTeFPokWo</a>                                               |
| 18 | Sentiment Analysis in e-Health Forums (Crohn'S Disease Related) |                                                                                                                                                           |

|    |                                                                        |  |
|----|------------------------------------------------------------------------|--|
| 19 | Sentiment Analysis in e-Health Forums (Breast Cancer Related)          |  |
| 20 | Factuality Classification in e-Health Forums (Food Allergy Related)    |  |
| 21 | Factuality Classification in e-Health Forums (Crohn'S Disease Related) |  |
| 22 | Factuality Classification in e-Health Forums (Breast Cancer Related)   |  |

**Table 2.** The links and mechanisms to access the datasets included in this study. For Task 7-12 and Task 15-16, the datasets are not publicly available but can potentially be accessed by sending requests to the shared task organizers.
